## Correction: Genetically enhanced T lymphocytes and the intensive care unit

Tiberiu Tat<sup>1,2</sup>, Huming Li<sup>3</sup>, Catalin-Sorin Constantinescu<sup>1,4</sup>, Anca Onaciu<sup>5</sup>, Sergiu Chira<sup>5</sup>, Ciprian Osan<sup>5</sup>, Sergiu Pasca<sup>5</sup>, Bobe Petrushev<sup>5</sup>, Vlad Moisoiu<sup>5</sup>, Wilhelm-Thomas Micu<sup>5</sup>, Cristian Berce<sup>6</sup>, Sebastian Tranca<sup>2</sup>, Delia Dima<sup>7</sup>, Ioana Berindan-Neagoe<sup>5</sup>, Jianliang Shen<sup>8</sup>, Ciprian Tomuleasa<sup>7,9</sup> and Liren Qian<sup>8</sup>

<sup>1</sup> Intensive Care Unit, Ion Chiricuta Clinical Cancer Research, Cluj Napoca, Romania

<sup>2</sup> Department of Anesthesiology-Intensive Care, Iuliu Hatieganu University of Medicine and Pharmacy, Cluj Napoca, Romania

<sup>3</sup> Department of Pulmonary and Critical Care Medicine, Navy General Hospital of PLA, Beijing, China

<sup>4</sup> Department of Hematology, Iuliu Hatieganu University of Medicine and Pharmacy, Cluj Napoca, Romania

<sup>5</sup> Research Center for Functional Genomics and Translational Medicine, Iuliu Hatieganu University of Medicine and Pharmacy, Cluj Napoca, Romania

<sup>6</sup> Department of Experimental Medicine, Iuliu Hatieganu University of Medicine and Pharmacy, Cluj Napoca, Romania

<sup>7</sup> Department of Hematology, Ion Chiricuta Clinical Cancer Research, Cluj Napoca, Romania

<sup>8</sup> Department of Hematology, Navy General Hospital of PLA, Beijing, China

<sup>9</sup> Research Center for Functional Genomics and Translational Medicine / Hematology, Iuliu Hatieganu University of Medicine and Pharmacy, Cluj Napoca, Romania

**Published:** August 10, 2018

**Copyright:** Tat et al. This is an open-access article distributed under the terms of the Creative Commons Attribution License 3.0 (CC BY 3.0), which permits unrestricted use, distribution, and reproduction in any medium, provided the original author and source are credited.

**This article has been corrected:** The correct Acknowledgment information is given below:

### ACKNOWLEDGMENTS

Tiberiu Tat, Huming Li and Catalin Constantinescu contributed equally to the current paper. The research on CAR-T cells was funded by an internal grant of the Iuliu Hatieganu University, awarded to Tiberiu Tat, as well as by a National Grant of the Romanian Government, for postdoctoral research, awarded to Delia Dima. This paper was financed by a grant awarded to Ciprian Tomuleasa - FDI - 2018.

Original article: Oncotarget. 2018; 9:16557-16572. <https://doi.org/10.18632/oncotarget.24637>
